# Supplementary material
Source: PubMed Central journal article supplement (PMC7015105)

Western blotting uncropped figures, lanes used in manuscript are marked with red rectangles and illustrated as follows.

**Main Figure 2C**

- (1) MCEC-Exo-ILK, MCEC+TNF $\alpha$ -Exo-ILK
- (2) MCEC-Exo-Flotilin-1, MCEC+TNF $\alpha$ -Exo-Flotilin-1
- (3) EPC-Exo-ILK, IL-10KO-EPC-Exo-ILK
- (4) EPC-Exo-Flotilin-1, IL-10KO-EPC-Exo-Flotilin-1

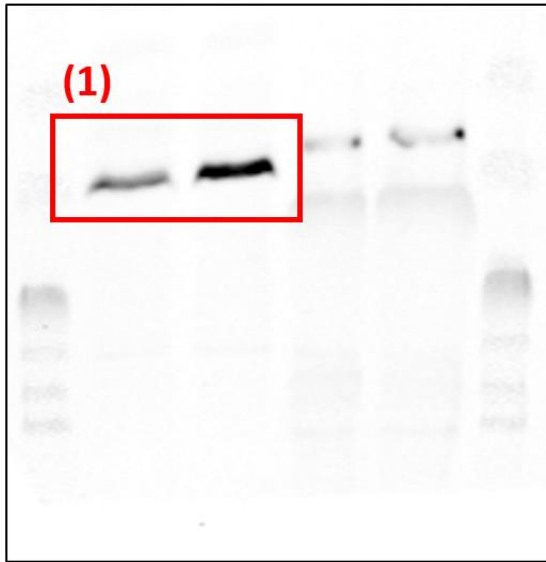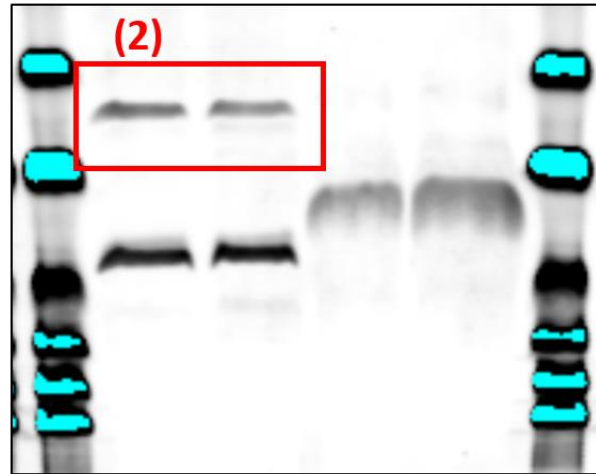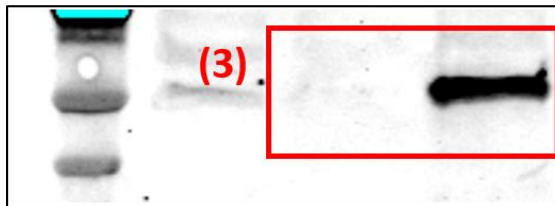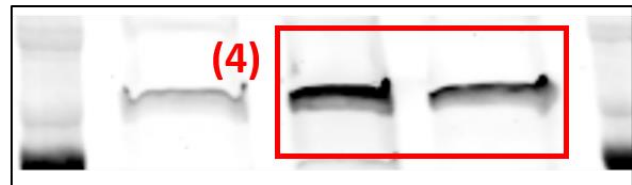

### Main Figure 4A

(1), (2), (3) Phospho-I $\kappa$ B panel in 3 groups (TNF $\alpha$ , MCEC+TNF $\alpha$ -Exo, MCEC-Exo)

(4), (5), (6) I $\kappa$ B $\alpha$  panel in 3 groups (TNF $\alpha$ , MCEC+TNF $\alpha$ -Exo, MCEC-Exo)

(7), (8), (9) beta-actin in 3 groups (TNF $\alpha$ , MCEC+TNF $\alpha$ -Exo, MCEC-Exo)

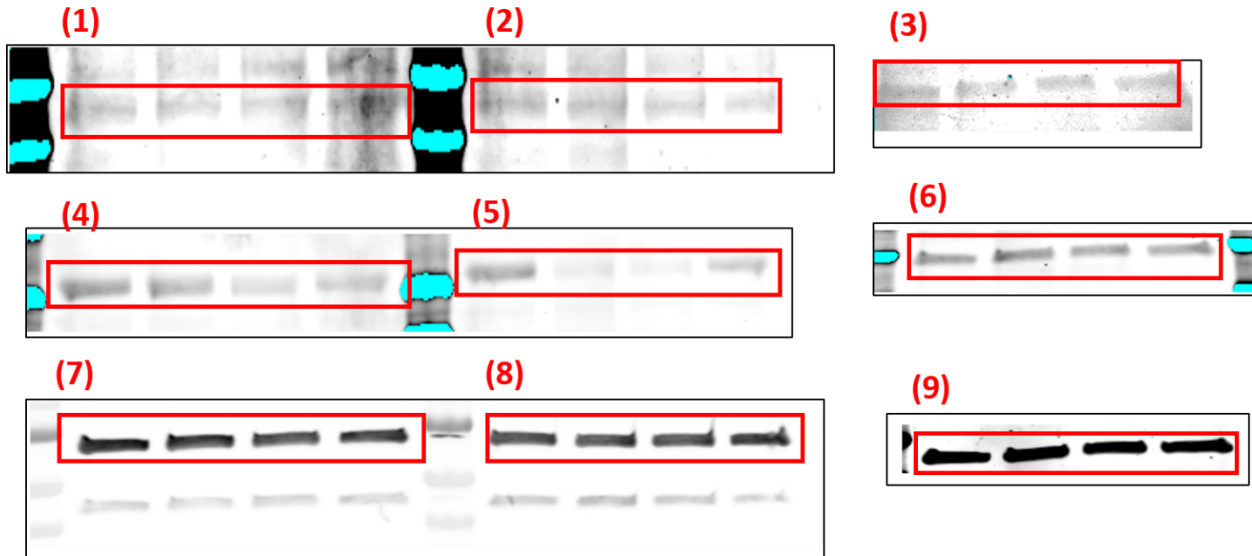

## Main Figure 6A

(1), (2), (3), (4) Phospho-I $\kappa$ B panel in 4 groups (TNF $\alpha$ , MCEC-Exo, MCEC-Exo, MCEC+TNF $\alpha$ -Exo, ILKKD-Exo)

(5), (6), (7), (8) I $\kappa$ B $\alpha$  panel in 4 groups (TNF $\alpha$ , MCEC-Exo, MCEC-Exo, MCEC+TNF $\alpha$ -Exo, ILKKD-Exo)

(9), (10), (11), (12) beta-actin in 4 groups (TNF $\alpha$ , MCEC-Exo, MCEC-Exo, MCEC+TNF $\alpha$ -Exo, ILKKD-Exo)

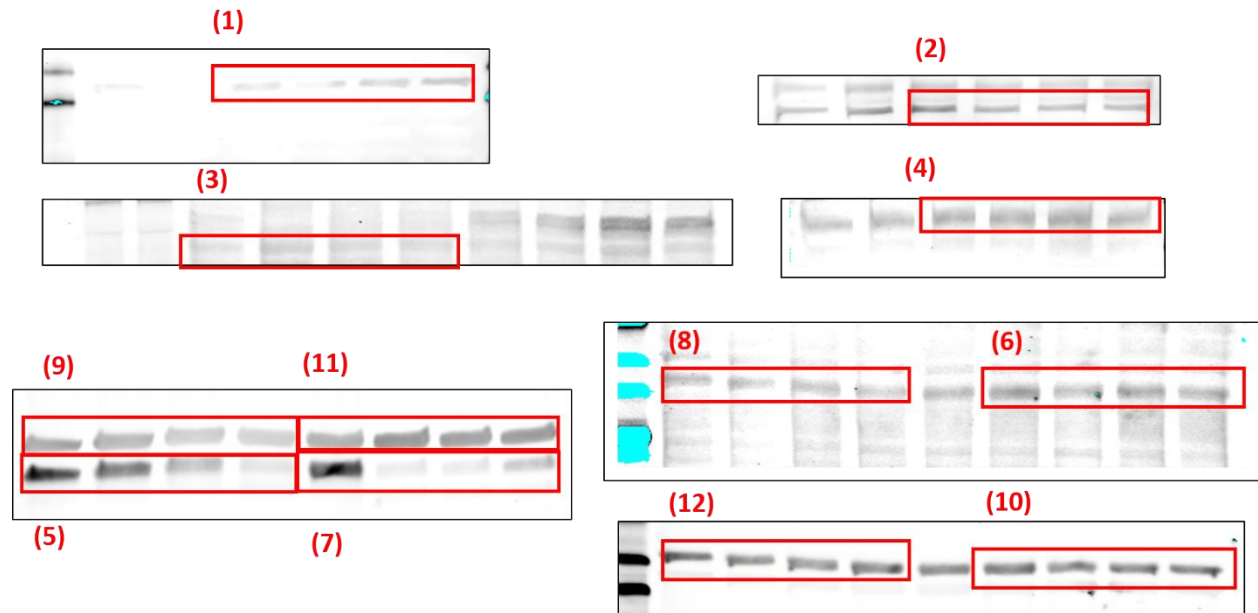

**Online Figure VA**

(1), (2) ILK in MCEC, MCEC+TNF $\alpha$  group and WT-EPC, IL-10KO-EPC group

(3), (4) beta-actin in MCEC, MCEC+TNF $\alpha$  group and WT-EPC, IL-10KO-EPC group

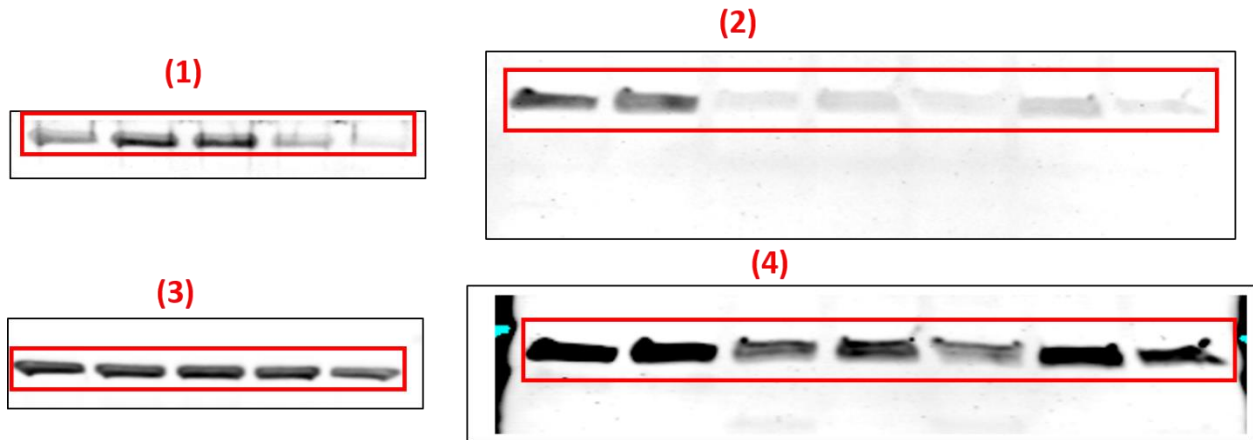

**Online Figure VC**

(1), (2) ILK in MCEC-Exo, MCEC+TNF $\alpha$ -Exo group and WT-EPC-Exo, IL-10KO-EPC-Exo group

(3), (4) Flotilin-1 in MCEC-Exo, MCEC+TNF $\alpha$ -Exo group and WT-EPC-Exo, IL-10KO-EPC-Exo group

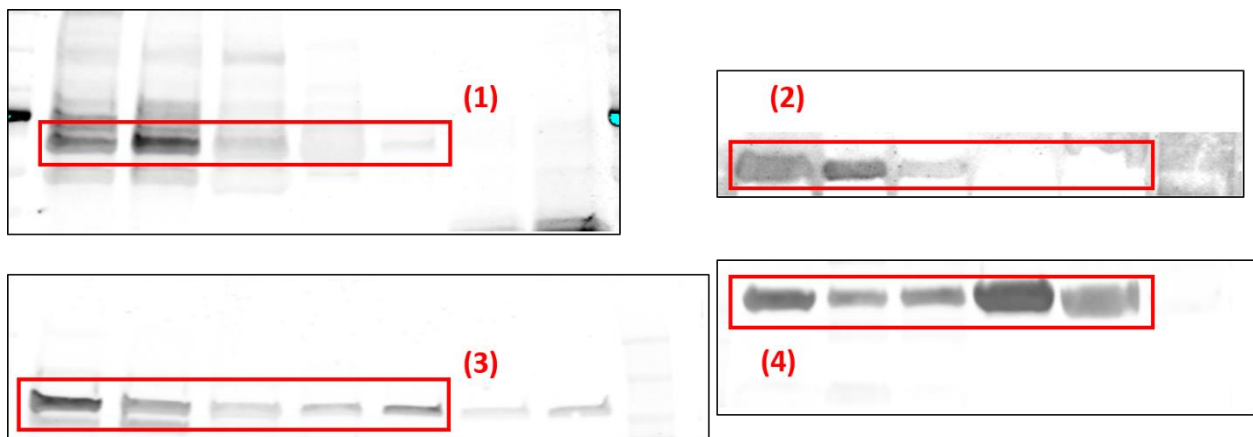

Supplement: NIHMS1549138-supplement-315829_Uncut_Gel_Blots.pdf [file NIHMS1549138-supplement-315829_Uncut_Gel_Blots.pdf]
